# Supplementary material for: Dietary lipoic acid alleviates autism-like behavior induced by acrylamide in adolescent mice: the potential involvement of the gut–brain axis
Source: Royal Society of Chemistry journal article supplement (doi:10.1039/d3fo05078e), 2024-01-01
Supplement: d3fo05078e1.pdf [file d3fo05078e1.pdf]

**Supplemental Table 1**

Table 1 Antibody Information and Primer Sequences Used for RT-qPCR Analysis

| <b>Antibody</b>  | <b>Catalog no.</b>        | <b>Supplier</b>                   |
|------------------|---------------------------|-----------------------------------|
| Rabbit anti-D28k | Ab108404                  | Abcam                             |
| Rabbit anti-Iba1 | ab178847                  | Abcam                             |
| <b>Gene Name</b> | <b>Forward Primer</b>     | <b>Reverse Primer</b>             |
| <i>Bdnf</i>      | CTCCGCCATGCAATTTCCACT     | GCCTTCATGCAACCGAAGTA              |
| <i>Cox-2</i>     | CCCATTAGCAGCCAGTTGTC      | CAGGATGCAGTGCTGAGTTC              |
| <i>Claudin-1</i> | AGCTGCCTGTTCCATGTACT      | CTCCCATTTGTCTGCTGCTC              |
| <i>Exr 1</i>     | GAGAGACTCGACATCAGCGA      | AGTGTCTGCAGTCTGATCGG              |
| <i>5-HT 1A</i>   | TCGCTCACTTGGCTCATTGGCTTT  | TTCCAACCTCTTGACCGTCTTGCG          |
| <i>5-HT 1B</i>   | TACCTCTACCAACCTCT         | ATACACCGTAGCGATTACA               |
| <i>Nlrp 3</i>    | GCAGCGATCAACAGGCGAGAC     | TCCAGCAAACCTATCCACTCCTC           |
| <i>Ngf</i>       | CGACTCCAAACACTGGAECTCA    | GCCTGCTTCTCATCTGTTGTCA            |
| <i>Occludin</i>  | ACGGACCCTGACCACTATGA      | TCAGCAGCAGCCATGTACTC              |
| <i>PSD-95</i>    | TCTGTGCGAGAGGTAGCAGA      | AAGCACTCCGTGAACTCCTG              |
| <i>NT 3</i>      | GTTCCAGCCAATGATTGCAA      | GGGCGAATTGTAGCGTCTCT              |
| <i>Tnf-α</i>     | GCCTCTTCTCATTCTGCTTGTGG   | GTGGTTTGTGAGTGTGAGGGTCTG          |
| <i>ZO-1</i>      | ACCCGAAACTGATGCTGTGGATAG  | AAATGGCCGGGCAGAACTTGTGTA          |
| <i>5-HT 2A</i>   | AGAAGCCACCTTGTGTGTGA      | TTGCTCATTGCTGATGGACT              |
| <i>β-actin</i>   | CAACTTGATGTATGAAGGCTTTGGT | ACTTTTATTGGTCTCAAGTCAGTGTA<br>CAG |
